# Supplementary material for: Spider crabs of the Western Atlantic with special reference to fossil and some modern Mithracidae
Source: PeerJ. 2015 Oct 1;3:e1301. doi: 10.7717/peerj.1301 (PMC4636416; doi:10.7717/peerj.1301)
Supplement: Table S1 — Database fossil majoids from the Western Atlantic. [file peerj-03-1301-s001.xlsx]

## Sheet: Table S1
Family	Subfamily	Based on modern (M) of fossil genus (F)	Based on modern (M) of fossil species (F)	Genus and species	Skeletal part	Stratigraphic unit	Age	Locality	Source
Epialtidae	Epialtinae	F	F	Eoinachoides senni Van Straelen, 1933	carapace	Castillo Fm	lower Miocene	Cerro la Cruz, Venezuela	Feldmann & Schweitzer (2004)
Epialtidae	Epialtinae	F	F	Eoinachoides senni Van Straelen, 1933	carapace	argiles à Raetomya, Santa Rita Fm	middle-upper Eocene	S of great route Coro-Barquisimeto, Venezuela	Van Straelen (1933); Aguilera et al. (2010)
Epialtidae	Epialtinae	F	F	Eoinachoides senni Van Straelen, 1933	carapace	Santa Rita Fm	middle-upper Eocene	Cerro Cometa, old road Coro–Barquisimeto, Venezuela	Aguilera et al. (2010)
Epialtidae	Epialtinae	F	F	Eoinachoides cf. senni Van Straelen, 1933	carapace	Gran Bajo del Gualicho Fm	Miocene	Puesto Picavea, Argentina	Aguirre-Urreta (1990) (age revised based on Reichler, 2010)
Epialtidae	Epialtinae	F		Eoinachoides sp.	carapace	Cantaure Fm	lower Miocene	San José de Cocodite, Península de Paraguaná, Venezuela	Aguilera et al. (2010)
Epialtidae	Epialtinae	F		Eoinachoides sp.	carapace	Caujarao Fm	upper Miocene	Carrizal, Venezuela	Aguilera et al. (2010)
Epialtidae	Pisinae	M		aff. Chorilia sp.	dactylus	Gran Bajo del Gualicho Fm	upper Pliocene	Bowden, Jamaica	Collins & Portell (1998)
Epialtidae	Pisinae	M	F	Herbstia excerta Collins & Morris, 1976	carapace	Coral Rock	Pliocene	Gibbons, Barbados	Collins & Morris (1976)
Epialtidae	Pisinae	M	M	Libinia dubia H. Milne-Edwards, 1834	dactylus	Yorktown Fm	Pliocene (rev)	Suffolk, Virginia, USA	Rathbun (1935)
Epialtidae	Pisinae	M	M	Libinia dubia H. Milne-Edwards, 1834	propodus, pincer	Yorktown Fm	Pliocene	Lone Star Marl Pit, Virginia, USA	FLMNH IP collection
Epialtidae	Pisinae	M	M	Libinia dubia H. Milne-Edwards, 1834	dactylus	Waccamaw Fm	lower Pleistocene	Shallotte 02, North Carolina, USA	FLMNH IP collection
Epialtidae	Pisinae	M	M	Libinia dubia H. Milne-Edwards, 1834	carapace	Pamlico Fm	upper Pleistocene	Wailes Bluff on the Potomac River near Point Lookout, Maryland, USA	Easton (1940)
Epialtidae	Pisinae	M	M	Libinia cf. dubia H. Milne-Edwards, 1834	dactyli	Yorktown Fm	Pliocene	Chesapeake Development Company Pit 02A, Virginia, USA	FLMNH IP collection
Epialtidae	Pisinae	M	M	Libinia emarginata Leach, 1815	dactylus		Miocene	near Murfreesboro, North Carolina, USA	Rathbun (1935)
Epialtidae	Pisinae	M	M	Libinia emarginata Leach, 1815	finger	Cape May Fm	Pleistocene	Two Mile Beach, New Jersey, USA	Rathbun (1935)
Epialtidae	Pisinae	M	M	Libinia emarginata Leach, 1815	finger	Cape May Fm	Pleistocene	Cape May, New Jersey, USA	Rathbun (1935)
Epialtidae	Pisinae	M	F	Libinia milnei (Collins & Donovan, 2012)	carapaces	Beaumont Fm	upper Pleistocene	Galveston Island, Texas, USA	Collins et al. (2014)
Epialtidae	Pisinae	M	F	Libinia milnei (Collins & Donovan, 2012)	carapace	Manchioneal Fm	lower Pleistocene	Folly Point, Jamaica	Collins & Donovan (2012)
Epialtidae	Pisinae	M	M	Libinia aff. setosa Lockington, 1877	?	Cercado Fm	upper Miocene (Messinian)	15910, Río Gurabo, Dominican Republic	Collins et al. (2009a) (age based on McNeill et al., 2011)
Epialtidae	Pisinae	M		Libinia sp.	fixed fingers	Waccamaw Fm	lower Pleistocene	Crescent Beach 02, South Carolina, USA	FLMNH IP collection
Epialtidae	Pisinae	M		Libinia sp.	propodus and dactylus	Colón Fm	upper Oligocene - lower Miocene	Cuba	Varela (2013)
Epialtidae	Pisinae	M		Libinia sp.	pincers	Yorktown Fm	Pliocene	Rice's Pit, Virginia, USA	FLMNH IP collection
Epialtidae	Pisinae	M		Libinia sp.	propodus	Caloosahatchee Fm	lower Pleistocene	Florida, USA	Portell & Agnew (2004); Collins et al. (2009a)
Epialtidae	Pisinae	M		Libinia sp.	propodus	Bermont Fm	middle Pleistocene	101 Ranch Pit 02, Florida, USA	Portell & Agnew (2004)
Epialtidae	Pisinae	M		Libinia sp.	propodus, dactylus, fingers, pincers	Caloosahatchee Fm/Bermont Fm	lower to middle Pleistocene	Star Ranch 01, Florida, USA	FLMNH IP collection
Epialtidae	Pisinae	M		Libinia sp.	dactyli, fixed fingers, orbital region	?Bermont Fm	middle Pleistocene	101 Ranch Pit 01, Florida, USA	Agnew (2001); FLMNH IP collection
Epialtidae	Pisinae	M		Libinia sp.	dactyli, fixed fingers, carapace fragment, orbital	?Bermont Fm	middle Pleistocene	101 Ranch Pit 02, Florida, USA	Agnew (2001); FLMNH IP collection
Epialtidae	Pisinae	M		Libinia sp.	dactyli, fixed fingers, carapace fragments	Caloosahatchee Fm/Bermont Fm	lower to middle Pleistocene	101 Ranch Pit 02B, Florida, USA	FLMNH IP collection
Epialtidae	Pisinae	M		Libinia sp.	pincer	Pinecrest beds, Tamiami Fm/Caloosahatchee Fm	upper Pliocene-lower Pleistocene	MacAsphalt Shell Pit, Florida, USA	FLMNH IP collection
Epialtidae	Pisinae	M		Libinia sp.	fixed finger	Pinecrest beds, Tamiami Fm	upper Pliocene-lower Pleistocene	Quality Aggregates, Phase 07, Florida, USA	FLMNH IP collection
Epialtidae	Pisinae	M		Libinia sp.	dactyli	Pinecrest beds, Tamiami Fm	upper Pliocene-lower Pleistocene	Quality Aggregates, Phase 09, Florida, USA	FLMNH IP collection
Epialtidae	Pisinae	M		Libinia sp.	dactylus, pincers	Pinecrest beds, Tamiami Fm	upper Pliocene-lower Pleistocene	Quality Aggregates, Phase 08, Florida, USA	FLMNH IP collection
Epialtidae	Pisinae	M		Libinia sp.	pincers	Bermont Fm	middle Pleistocene	GKK Pit 01, Florida, USA	FLMNH IP collection
Epialtidae	Pisinae	M		Libinia sp.	pincer	Bermont Fm	middle Pleistocene	Longan Lakes 01c, Florida, USA	FLMNH IP collection
Epialtidae	Pisinae	M		Libinia sp.	dactylus	Caloosahatchee Fm	lower Pleistocene	De Soto Shell Pit 04, Florida, USA	FLMNH IP collection
Epialtidae	Pisinae	M		Libinia sp.	pincer		Pleistocene	Crescent Lake Canal, Florida, USA	FLMNH IP collection
Epialtidae	Pisinae	M		Libinia sp.	pincer		Plio-Pleistocene	North Port area, Florida, USA	FLMNH IP collection
Epialtidae	Pisinae	M		Libinia sp.	propodi + carpi, dactyli, pincers, carpus, meri	Pinecrest beds, Tamiami Fm	upper Pliocene-lower Pleistocene	SMR Aggregates, Phase 10, Florida, USA	FLMNH IP collection
Epialtidae	Pisinae	M		Libinia sp.	pincers	Ecphora zone, Jackson Bluff Fm	upper Pliocene	Jackson Bluff 01, Florida, USA	FLMNH IP collection
Epialtidae	Pisinae	M		Libinia sp.	carapace	Anastasia Fm	upper Pleistocene	Bunnel 02, Florida, USA	FLMNH IP collection
Epialtidae	Pisinae	M		Libinia sp.	pincers	Unit 1, Parachucla Fm	upper Oligocene - lower Miocene	White Springs, Florida, USA	FLMNH IP collection
Epialtidae	Pisinae	M		Libinia sp.	?	Bone Bed, Bermont Fm	middle Pleistocene	Leisey Shell Pit 03, Florida, USA	FLMNH IP collection
Epialtidae	Pisinae	M	F	Rochinia boschii Casadío et al., 2005	carapaces	Puerto Madryn Fm	lower upper Miocene (Tortonian)	Waypoint 13, near Puerto Piramide, Argentina	Casadío et al. (2005)
Epialtidae	Pisinae	M	F	Rochinia boschii Casadío et al., 2005	carapace	Puerto Madryn Fm	lower upper Miocene (Tortonian)	Waypoint 17, near Puerto Piramide, Argentina	Casadío et al. (2005)
Epialtidae	Pisinae	M		aff. Rochinia sp.	dactyli	Bowden shell bed, Bowden Fm	upper Pliocene	Bowden, Jamaica	Collins & Portell (1998)
Epialtidae	Tychinae	M	M	Pitho anisodon (von Martèns, 1872)	carapace	Port Morant Fm	upper Pleistocene	near Old Pera, Jamaica	Collins et al. (1996)
Epialtidae	Tychinae	M		Pitho sp.	propodus	?Bermont Fm	middle Pleistocene	101 Ranch Pit 01, Florida, USA	FLMNH IP collection
Epialtidae	Tychinae	M		Pitho sp.	fixed finger and dactyli	Bowden shell bed, Bowden Fm	upper Pliocene	Bowden, Jamaica	Collins & Portell (1998)
Epialtidae	Tychinae	M		?Pitho sp.	fixed finger	Escudo de Veraguas Fm	upper Pliocene	Escudo de Veraguas, Panama	Todd & Collins (2006)
Epialtidae	Tychinae	M		aff. Pitho sp.	dactyli	Bed 3, spoil	Pleistocene	101 Ranch Pit, Florida USA	Agnew (2001)
Inachidae		F	F	n. gen., n. sp. Franţescu, 2013	carapace	Santee Limestone	Eocene (upper Lutetian - lower Bartonian)	Martin Marietta Berkeley Quarry, South Carolina, USA	Franţescu (2013)
Inachoididae		M	F	Euprognatha ricei Blow, 2003	carapaces	Moore House Mbr, Yorktown Fm	upper Pliocene	Rices Pit, Hampton, Virginia, USA	Blow (2003)
Inachoididae		M		Euprognatha sp.	dactyls	?Jackson Bluff Fm	upper Pliocene	Hosford, Florida, USA	Rathbun (1935); Portell & Agnew (2004)
Inachoididae		M	F	Leurocyclus primigenius Aguirre-Urreta, 1990	carapaces	Patagonia Fm	upper Oligocene-lower Miocene	Estancia Tolosa, Argentina	Aguirre-Urreta (1990)
Majidae	Majinae	F	F	Chondromaia antiqua Feldmann et al., 2013	carapace	Mount Laurel Fm	Upper Cretaceous (early Maastrichtian)	Hop Brook, New Jersey, USA	Feldmann et al. (2013)
Majidae	Majinae	F	F	Wilsonimaia ethelae Blow & Manning, 1996	carapace	Castle Hayne Limestone	Eocene (mid-Lutetian-Priabonian)	near Northeast Cape Fear River, North Carolina, USA	Blow & Manning (1996)
Majidae	Majinae	F	F	Wilsonimaia ethelae Blow & Manning, 1996	carapace	Santee Limestone	Eocene (upper Lutetian - lower Bartonian)	Martin Marietta Georgetown Quarry, South Carolina, USA	Franţescu (2013)
Majidae	Majinae	F	F	Wilsonimaia ?ethelae Blow & Manning, 1996	carapace	Castle Hayne Limestone	Eocene (mid-Lutetian-Priabonian)	North Carolina, USA	Clements (2014)
Majidae	Majinae	F	F	Wilsonimaia schneiderorum Blow & Manning, 1996	carapace	Castle Hayne Limestone	Eocene (mid-Lutetian-Priabonian)	Ideal Cement Company Quarry, North Carolina, USA	Blow & Manning (1996)
Majidae	Majinae	F	F	Wilsonimaia schneiderorum Blow & Manning, 1996	carapace	Castle Hayne Limestone	Eocene (mid-Lutetian-Priabonian)	North Carolina, USA	Clements (2014)
Mithracidae s.s.		M	M	Damithrax "hispidus" (Herbst, 1790) (= Mithrax caribbaeus Rathbun, 1920)	propodus + carpus	Coral Rock	Pleistocene	Highgate, Barbados	Collins & Morris (1976)
Mithracidae s.s.		M	M	Damithrax cf. "hispidus" (Herbst, 1790) (= Mithrax cf. caribbaeus Rathbun, 1920)	propodus	Falmouth Fm	upper Pleistocene	Rio Bueno Harbor, Jamaica	Morris (1993)
Mithracidae s.s.		M	M	Damithrax "hispidus" (Herbst, 1790)	cheliped merus	Port Morant Fm	upper Pleistocene	near Old Pera, Jamaica	Collins et al. (1996)
Mithracidae s.s.		M	M	Damithrax "hispidus" (Herbst, 1790)	?	Vedado Fm	Plio-Pleistocene	near La Habana, Cuba	in Brönnimann & Rigassi (1963) acc to Varela & Rojas-Consuegra (2009); Varela & Rojas-Consuegra (2011)
Mithracidae s.s.		M	M	Damithrax "hispidus" (Herbst, 1790)	carapaces	Coral Rock	Pliocene	Gibbons, Barbados	Collins & Morris (1976)
Mithracidae s.s.		M	M	Damithrax "hispidus" (as Mithrax caribbaeus Rathbun, 1920)	carapace	Coral Rock	Pliocene	Gibbons, Barbados	Collins & Morris (1976)
Mithracidae s.s.		M	F	Damithrax unguis (Portell & Collins, 2004)	carapaces	Montpelier Fm	lower Miocene	Duncans Quarry, Jamaica	Portell & Collins (2004); FLMNH IP collection
Mithracidae s.s.		M	M	Damithrax cf. pleuracanthus (Stimpson, 1871)	carapace		upper Pliocene - lower Pleistocene	MacAsphalt Shell Pit, Florida, USA	FLMNH IP collection (UF 29057)
Mithracidae s.s.		M	M	Maguimithrax spinosissimus (Lamarck, 1818)	propodus and pereiopod	Seroe Domi Fm	Pliocene	Curaçao	Stepp (2014)
Mithracidae s.s.		M	M	Maguimithrax spinosissimus (Lamarck, 1818)	carapace	Coral Rock	Pliocene	Blower's Gully, Barbados	Collins & Morris (1976)
Mithracidae s.s.		M	M	Maguimithrax spinosissimus (Lamarck, 1818)	carpus + propodus, meri	Coral Rock	Pleistocene	Highgate, Barbados	Collins & Morris (1976)
Mithracidae s.s.		M	M	Maguimithrax spinosissimus (Lamarck, 1818)	carpus	Coral Rock	Pliocene	Gibbons, Barbados	Collins & Morris (1976)
Mithracidae s.s.		M	M	Maguimithrax spinosissimus (Lamarck, 1818)	?	Falmouth Fm	upper Pleistocene	Rio Bueno Harbor, Jamaica	Morris (1993)
Mithracidae s.s.		M		aff. Macrocoeloma sp.	dactylus	Bed 6, ?Bermont Fm	middle Pleistocene	101 Ranch Pit 02, Florida USA	Agnew (2001); FLMNH IP collection
Mithracidae s.s.		M	M	Mithraculus aff. coryphe (Herbst, 1785)	carapace	August Town Fm	upper Miocene	Fowl House Spring, Jamaica	Collins et al. (2010)
Mithracidae s.s.		M	M	Mithraculus forceps A. Milne-Edwards, 1875	chela-carpus	Port Morant Fm	upper Pleistocene	SW of Port Morant Harbor, Jamaica	Collins et al. (2009b)
Mithracidae s.s.		M	M	Mithraculus cf. forceps A. Milne-Edwards, 1875	carapaces	Falmouth Fm	upper Pleistocene	Rio Bueno Harbor, Jamaica	Morris (1993)
Mithracidae s.s.		M	M	Mithrax aculeatus (Herbst, 1790) (= Mithrax verrucosus H. Milne Edwards, 1832)	claws	Port Morant Fm	upper Pleistocene	SW of Port Morant Harbor, Jamaica	Collins et al. (2009b)
Mithracidae s.s.		M	M	Mithrax aculeatus (Herbst, 1790) (= Mithrax verrucosus H. Milne Edwards, 1832)	chela	Port Morant Fm	upper Pleistocene	near Old Pera, Jamaica	Collins et al. (1996)
Mithracidae s.s.		M	M	Mithrax aculeatus (Herbst, 1790) (= Mithrax verrucosus H. Milne Edwards, 1832)	carapaces	Coral Rock	Pliocene	Gibbons, Barbados	Collins & Morris (1976)
Mithracidae s.s.		M	M	Mithrax aculeatus (Herbst, 1790) (= Mithrax verrucosus H. Milne Edwards, 1832)	carapace	Coral Rock	Pliocene	Cluffs, Barbados	Collins & Morris (1976)
Mithracidae s.s.		M	M	Mithrax aculeatus (Herbst, 1790) (= Mithrax verrucosus H. Milne Edwards, 1832)	carapace	Coral Rock	Pleistocene	Silversands, Barbados	Collins & Morris (1976)
Mithracidae s.s.		M	M	Mithrax aculeatus (Herbst, 1790) (= Mithrax verrucosus H. Milne Edwards, 1832)	propodi	Coral Rock	Pleistocene	Highgate, Barbados	Collins & Morris (1976)
Mithracidae s.s.		M	M	Mithrax aculeatus (Herbst, 1790) (= Mithrax verrucosus H. Milne Edwards, 1832)	propodus + carpus	Coral Rock	Plio- or Pleistocene	Garrison, Barbados	Collins & Morris (1976)
Mithracidae s.s.		M	M	Mithrax hemphilli Rathbun, 1892	carapaces	Coral Rock	Pleistocene	Highgate, Barbados	Collins & Morris (1976)
Mithracidae s.s.		M		Mithrax arawakum sp. nov.	carapaces	Montpelier Fm	lower Miocene	Duncans Quarry, Jamaica	FLMNH IP collection (UF 112682 + UF 112941)
Mithracidae s.s.		M		"Mithrax" sp.	merus	Port Morant Fm	upper Pleistocene	SE of Port Morant Bay, Jamaica	Collins & Donovan (1998)
Mithracidae s.s.		M		"Mithrax" sp.	fixed finger	Bowden shell bed, Bowden Fm	upper Pliocene	Bowden, Jamaica	Collins & Portell (1998)
Mithracidae s.s.		M		"Mithrax" sp.	propodus	El Abra Mbr, Canímar Fm	Pliocene	Río Yumurí, Cuba	Varela & Rojas-Consuegra (2009)
Mithracidae s.s.		M		"Mithrax" sp.	propodus	Lagunitas Fm	lower Miocene (Burdigalian)	La Sierpe Canal del Zaza, Cuba	Varela (2013)
Mithracidae s.s.		M		"Mithrax" sp.	fixed finger	Lomas del Mar Reef Mbr Moin Fm	upper Pliocene-lower Pleistocene	SW of Bella Vista and S and SE of Lomas del Mar, Costa Rica	Todd & Collins (2006)
Mithracidae s.s.		M		"Mithrax" sp.	pereiopod manus	Mollusc Mudstone, Moin Fm	upper Pliocene	1.5 km W of Pueblo Nuevo, Costa Rica	Todd & Collins (2006)
Mithracidae s.s.		M		"Mithrax" sp.	carapace		Pleistocene	South of Mole St.-Nicolas, Haiti	Rathbun (1923)
Mithracidae s.s.		M		"Mithrax" sp.	carapace	Hopegate Fm	upper Pliocene	Rio Bueno Quarry 01, Jamaica	FLMNH IP collection (UF 113445)
Mithracidae s.s.		M		"Mithrax" sp.	carapace	Hopegate Fm	upper Pliocene	Rio Bueno Quarry 02, Jamaica	FLMNH IP collection (UF 113619)
Mithracidae s.s.		M		"Mithrax" sp.	?	San Gregorio Fm	Pliocene	Venezuela	Aguilera et al. (2010)
Mithracidae s.s.		M		"Mithrax" sp.	propodus + dactylus	Paraguaná Fm	lower Pliocene	Club Miramar, Península de Paraguaná, Venezuela	Aguilera et al. (2010)
Mithracidae s.s.		M		"Mithrax" sp.	appendage fragments	"Araya Quarry"	Pleistocene	Salina de Araya, Península de Araya, Venezuela	Aguilera et al. (2010)
Mithracidae s.s.		M		"?Mithrax" sp.	carapaces	Chowan River Fm	upper Pliocene (Piacenzian)	?Lee Creek Mine, North Carolina, USA	Young (2014)
Mithracidae s.s.		M	M	Nemausa acuticornis (Stimpson, 1870)	carapaces	Port Morant Fm	upper Pleistocene	SW of Port Morant Harbor, Jamaica	Collins et al. (2009b)
Mithracidae s.s.		M	F	Nemausa donovani (Portell & Collins, 2004)	carapace	Montpelier Fm	lower Miocene	Duncans Quarry, Jamaica	Portell & Collins (2004)
Mithracidae s.s.		M	F	Nemausa windsorae sp. nov.	carapace	Montpelier Fm	lower Miocene	Duncans Quarry, Jamaica	FLMNH IP collection (UF 113651)
Mithracidae s.s.		M		Nemausasp.	carapace	Hopegate Fm	upper Pliocene	Discovery Marine Lab 01, Jamaica	Donovan et al. (2004, poster content); FLMNH IP collection (UF 113510)
Mithracidae s.s.		M	F	Teleophrys acornis Portell & Collins, 2004	carapace	Montpelier Fm	lower Miocene	Duncans Quarry, Jamaica	Portell & Collins (2004)
Mithracidae s.s.		M	M	Teleophrys ruber (Stimpson, 1871)	carapace	Coral Rock	Pliocene	Gibbons, Barbados	Collins & Morris (1976)
Mithracidae s.s.		M	F	Thoe asperoides Collins & Todd (in Todd & Collins, 2006)	carapace	Tobabe Sandstone Fm	upper Miocene (upper Tortonian-Messinian)	W-most island of Plantain Cays, Panama	Todd & Collins (2006)
Mithracidae s.s.		M	F	Thoe asperoides Collins & Todd (in Todd & Collins, 2006)	fixed finger	Lomas del Mar Reef Mbr Moin Fm	upper Pliocene-lower Pleistocene	SW of Bella Vista and S and SE of Lomas del Mar, Costa Rica	Todd & Collins (2006)
Mithracidae s.l.		M	F	Stenocionops suwanneeana Rathbun, 1935	propodus	Ocala Limestone	upper Eocene (Priabonian)	Rowland's Bluff, Florida, USA	Rathbun (1935); Portell (2004: FFI)
Mithracidae s.l.		M	F	Stenocionops primus Rathbun, 1935	propodus	Brownstown Marl	Upper Cretaceous (Santonian)	South of Buckrange, Arkansas, USA	Rathbun (1935)
Mithracidae s.l.		M	F	Stenocionops dyeri Blow, 2003	carapaces	Moore House Mbr, Yorktown Fm	upper Pliocene	Lone Star Lakes, Virginia, USA	Blow (2003)
Mithracidae s.l.		M	F	Stenocionops dyeri Blow, 2003	carapace	spoil, Yorktown Fm	Pliocene	Lone Star Marl Pit, Virginia, USA	FLMNH IP collection
Mithracidae s.l.		M	F	Stenocionops dyeri Blow, 2003	carapaces	Zone 2, crossbed facies, Yorktown Fm	Pliocene	Lone Star Marl Pit, Virginia, USA	FLMNH IP collection
Mithracidae s.l.		M	M	Stenocionops coelatus (A. Milne-Edwards, 1878)	dactylus and propodus	Yorktown Fm	lower Pliocene (Zanclean)	?Lee Creek Mine, North Carolina, USA	Young (2014)
Mithracidae s.l.		M		Stenocionops sp.	propodus		?Pliocene	16986, Río Cana, Dominican Republic	Collins et al. (2009a) (age based on Saunders et al., 1986)
Mithracidae s.l.		M		aff. Stenocionops sp.	?	Cercado Fm	upper Miocene (Messinian)	16842, Río Cana, Dominican Republic	Collins et al. (2009a) (age based on McNeill et al., 2011)
Mithracidae s.l.		M		aff. Stenocionops sp.	?		?upper Miocene	16928, Río Mao, Dominican Republic	Collins et al. (2009a) (age based on Saunders et al., 1986)
Oregoniidae		M	M	Hyas araneus Linnaeus, 1758	dactylus and propodus	Leda clay	Pleistocene	Westbrook, Maine, USA	Rathbun (1935)
Oregoniidae		M		aff. Hyas sp.	pereiopod merus	Port Morant Fm	upper Pleistocene	SW of Port Morant Harbor, Jamaica	Collins et al. (2009b)
Oregoniidae		M		aff. Hyas sp.	dactylus	Bowden shell bed, Bowden Fm	upper Pliocene	Bowden, Jamaica	Collins & Portell (1998)
Oregoniidae		M		aff. Hyas sp.	dactyli	Tuira Fm	upper Miocene (lower Tortonian)	5 km NE of Comun, Panama	Todd & Collins (2006)
