# Supplementary material for: Spider crabs of the Western Atlantic with special reference to fossil and some modern Mithracidae
Source: PeerJ. 2015 Oct 1;3:e1301. doi: 10.7717/peerj.1301 (PMC4636416; doi:10.7717/peerj.1301)
Supplement: Table S2 — Measurements modern and fossil mithracids from the Western Atlantic. [file peerj-03-1301-s002.xlsx]

## Sheet: Table S2
Taxon	Museum Number; (IZ = FLMNH Invertebrate Zoology at UF; IP = FLMNH Invertebrate Paleontology at UF)	Length without rostral spines (mm)	Width without lateral spines (mm)	L/w ratio	Male (1) or Female (2)	Source
Damithrax hispidus	UF 11456 (IZ)	68	75.4	0.901857	1	herein
D. hispidus	UF 13256 (IZ)	35.7	39.2	0.910714	1	herein
D. hispidus	UF 11615 (IZ)	34.4	35.7	0.963585	1	herein
D. hispidus	UF 1219 (IZ)	27.1	29.2	0.928082	2	herein
D. hispidus	UF 29701 (IZ)	26.8	28.2	0.950355	1	herein
D. hispidus	UF 1103 (IZ)	33.3	36.4	0.914835	1	herein
D. hispidus	UF 1198 (IZ)	24.9	25.5	0.976471	1	herein
D. hispidus	UF 1186 (IZ)	31.5	33.8	0.931953	1	herein
D. hispidus	UF 26100 (IZ)	38.9	44.5	0.874157	2	herein
D. hispidus	UF 11608 (IZ)	27.8	28.1	0.989324	1	herein
D. hispidus	UF 7538 (IZ)	24.7	25.8	0.957364	1	herein
D. hispidus	UF 1186 (IZ)	29.9	30.5	0.980328	1	herein
D. hispidus	UF 1186 (IZ)	24.3	25.8	0.94186	1	herein
D. hispidus	UF 1186 (IZ)	25.7	27	0.951852	2	herein
D. hispidus	UF 1186 (IZ)	21.4	22.9	0.934498	2	herein
D. hispidus	UF 1186 (IZ)	20.6	21.7	0.949309	2	herein
D. hispidus	UF 1034 (IZ)	22.3	23.6	0.944915	2	herein
D. hispidus	UF 1034 (IZ)	23.2	23.3	0.995708	1	herein
D. hispidus	UF 1034 (IZ)	20.6	21	0.980952	2	herein
D. hispidus	UF 1034 (IZ)	18.1	18.2	0.994505	1	herein
D. unguis	UF 255053 (IP)	5.4	5.4	1		herein
D. unguis	UF 255054 (IP)	5.4	5.3	1.01887		herein
D. unguis	UF 112785 (IP)	8.7	8.7	1		herein
D. unguis	UF 106768 (IP)		15			herein
D. unguis	UF 112795 (IP)	6.5	6.4	1.01562		herein
D. unguis	UF 113117 (IP)		10.5			herein
D. unguis	UF 106772 (IP)	9.8	10.5	0.933333		herein
D. unguis	UF 73089 (IP)		12.2			herein
D. unguis	UF 113586 (IP)		8.5			herein
D. unguis	UF 112783 (IP)	9.3	9.8	0.94898		herein
D. unguis	UF 113587 (IP)		11.7			herein
D. unguis	UF 113677 (IP)		15.8			herein
D. unguis	UF 255051 (IP)	14.5	15.9	0.91195		herein
D. unguis	UF 113011 (IP)		13.2			herein
D. unguis	UF 112784 (IP)	10.5	11.6	0.905172		herein
D. unguis	UF 255052 (IP)					herein
D. unguis	UF 106697 (IP)	11.1	12.1	0.917355		herein
D. unguis	UF 111483 (IP)		7.3			herein
D. unguis	UF 73165 (IP)					herein
D. unguis	UF 113675 (IP)					herein
D. unguis	UF 112946 (IP)		10.2			herein
D. unguis	UF 112942 (IP)		16.4			herein
D. unguis	UF 113010 (IP)	5.05	4.9	1.03061		herein
D. unguis	UF 103955 (IP)		11.3			herein
D. unguis	UF 103954 (IP)		10.4			herein
Maguimithrax spinosissimus	UF 41777 (IZ)	163	167	0.976048	1	herein
M. spinosissimus	UF 12474 (IZ)	37.1	34.1	1.08798	2	herein
M. spinosissimus	UF 11447 (IZ)	37.4	34.3	1.09038	1	herein
M. spinosissimus	UF 11457 (IZ)	39.2	36.4	1.07692	2	herein
M. spinosissimus	UF 31157 (IZ)	63.9	62	1.03065	1	herein
M. spinosissimus	UF 31157 (IZ)	68.9	68	1.01324	2	herein
M. spinosissimus	UF 11388 (IZ)	74.4	72.2	1.03047	2	herein
M. spinosissimus	UF 11388 (IZ)	85.6	87.9	0.973834	1	herein
Nemausa acuticornis	FSBC I 009758	30.3	27.7	1.09386	1	herein
N. acuticornis	FSBC I 009758	31.1	28.4	1.09507	1	herein
N. acuticornis	FSBC I 009758	32.2	29.5	1.09153	1	herein
N. acuticornis	FSBC I 009758	32.2	29	1.11034	1	herein
N. acuticornis	FSBC I 009758	34.4	31.9	1.07837	1	herein
N. acuticornis	FSBC I 050559	13.1	11.5	1.13913	1	herein
N. acuticornis	FSBC I 050559	13.1	10.6	1.23585	1	herein
N. acuticornis	FSBC I 050559	13.4	11.9	1.12605	1	herein
N. acuticornis	FSBC I 050561	9.6	7.9	1.21519	1	herein
N. acuticornis	FSBC I 050561	13.4	11.4	1.17544	1	herein
N. acuticornis	FSBC I 050561	20.1	18.1	1.1105	1	herein
N. acuticornis	FSBC I 050561	21.2	18.5	1.14595	1	herein
N. acuticornis	FSBC I 050561	21.3	19.4	1.09794	1	herein
N. acuticornis	FSBC I 050561	22.2	19.5	1.13846	1	herein
N. acuticornis	FSBC I 050561	24.9	21.8	1.1422	1	herein
N. acuticornis	FSBC I 050561	24.3	22.2	1.09459	1	herein
N. acuticornis	FSBC I 050561	25.6	23.7	1.08017	1	herein
N. acuticornis	FSBC I 050561	24.8	21.7	1.14286	1	herein
N. acuticornis	FSBC I 050562	6.1	4.8	1.27083	1	herein
N. acuticornis	FSBC I 050562	11.5	10	1.15	1	herein
N. acuticornis	FSBC I 050562	11.9	10.4	1.14423	1	herein
N. acuticornis	FSBC I 050562	12.1	10	1.21	1	herein
N. acuticornis	FSBC I 050562	14.9	12.6	1.18254	1	herein
N. acuticornis	FSBC I 050562	15	13.1	1.14504	1	herein
N. acuticornis	FSBC I 050562	17.8	16.5	1.07879	1	herein
N. acuticornis	FSBC I 050562	18.9	17.5	1.08	1	herein
N. acuticornis	FSBC I 050565	15.3	13.4	1.14179	1	herein
N. acuticornis	FSBC I 050565	15.5	14	1.10714	1	herein
N. acuticornis	FSBC I 050565	19.9	18.4	1.08152	1	herein
N. acuticornis	FSBC I 009758	10.5	8.5	1.23529	2	herein
N. acuticornis	FSBC I 009758	20.8	18.4	1.13043	2	herein
N. acuticornis	FSBC I 009758	24.4	21.8	1.11927	2	herein
N. acuticornis	FSBC I 009758	26.1	22.9	1.13974	2	herein
N. acuticornis	FSBC I 050559	10.3	8.5	1.21176	2	herein
N. acuticornis	FSBC I 050559	11.1	9.5	1.16842	2	herein
N. acuticornis	FSBC I 050561	10.5	8.8	1.19318	2	herein
N. acuticornis	FSBC I 050561	10.8	9.1	1.18681	2	herein
N. acuticornis	FSBC I 050561	15.3	13	1.17692	2	herein
N. acuticornis	FSBC I 050561	17	14.8	1.14865	2	herein
N. acuticornis	FSBC I 050561	18.2	16.4	1.10976	2	herein
N. acuticornis	FSBC I 050561	19.3	17	1.13529	2	herein
N. acuticornis	FSBC I 050561	20.6	18.3	1.12568	2	herein
N. acuticornis	FSBC I 050561	25.5	23	1.1087	2	herein
N. acuticornis	FSBC I 050562	6.1	4.8	1.27083	2	herein
N. acuticornis	FSBC I 050562	9.5	7.8	1.21795	2	herein
N. acuticornis	FSBC I 050562	12.8	10.8	1.18519	2	herein
N. acuticornis	FSBC I 050562	13.8	11.9	1.15966	2	herein
N. acuticornis	FSBC I 050562	14.2	12.5	1.136	2	herein
N. acuticornis	FSBC I 050562	14.4	12.2	1.18033	2	herein
N. acuticornis	FSBC I 050562	14.5	12.4	1.16935	2	herein
N. acuticornis	FSBC I 050562	15.2	13.2	1.15152	2	herein
N. acuticornis	FSBC I 050562	15.2	13.3	1.14286	2	herein
N. acuticornis	FSBC I 050562	15.5	13.6	1.13971	2	herein
N. acuticornis	FSBC I 050562	15.6	13.7	1.13869	2	herein
N. acuticornis	FSBC I 050562	15.7	13.5	1.16296	2	herein
N. acuticornis	FSBC I 050562	15.7	13.9	1.1295	2	herein
N. acuticornis	FSBC I 050562	15.8	13.9	1.13669	2	herein
N. acuticornis	FSBC I 050562	16.4	14.7	1.11565	2	herein
N. acuticornis	FSBC I 050562	16.7	14.5	1.15172	2	herein
N. acuticornis	FSBC I 050562	16.9	14.7	1.14966	2	herein
N. acuticornis	FSBC I 050562	17.3	15.2	1.13816	2	herein
N. acuticornis	FSBC I 050562	17.6	14.9	1.18121	2	herein
N. acuticornis	FSBC I 050562	18.1	15.9	1.13836	2	herein
N. acuticornis	FSBC I 050565	14.5	12.7	1.14173	2	herein
N. acuticornis	FSBC I 050565	16.1	14.1	1.14184	2	herein
N. miocenica sp. nov.	UF 113651 (IP)	27.7	23.3	1.18884		herein
N. cornuta		31.5	26	1.21154		Rathbun (1925: pl. 137.3)
N. cornuta		23.9	19.2	1.24479		Rathbun (1925: pl. 137.4)
N. sinensis		8.7	8.2	1.06098		Rathbun (1892: pl. 38.2)
N. sinensis		12.6	12.2	1.03279		Rathbun (1925: pl. 151.3)
N. sinensis		14.5	14.3	1.01399		Garth (1958: pl. 41.1)
N. spinipes		11	8.2	1.34146		Rathbun (1925: pl. 136.4)
N. spinipes		13.4	10.6	1.26		Bell (1836: pl. 9.6)
