# Supplementary material for: Spider crabs of the Western Atlantic with special reference to fossil and some modern Mithracidae
Source: PeerJ. 2015 Oct 1;3:e1301. doi: 10.7717/peerj.1301 (PMC4636416; doi:10.7717/peerj.1301)
Supplement: Table S3 — Data on Damithrax hispidus from Florida. [file peerj-03-1301-s003.xlsx]

## Sheet: Table S3
Taxon	Museum Number	Length without rostral spines (mm)	Width without lateral spines (mm)	L/w ratio	Male (1) or Female (2)	2nd spine inner side cheliped merus	Which side(s): both, left only, right only	Place of collection
Damithrax hispidus	UF 11456 (IZ)	68	75.4	0.901857	1	y	b	Florida
D. hispidus	UF 13256 (IZ)	35.7	39.2	0.910714	1	y	b	Florida
D. hispidus	UF 11615 (IZ)	34.4	35.7	0.963585	1	y	b	Florida
D. hispidus	UF 1219 (IZ)	27.1	29.2	0.928082	2	y	r	Florida
D. hispidus	UF 29701 (IZ)	26.8	28.2	0.950355	1	n		Florida
D. hispidus	UF 1103 (IZ)	33.3	36.4	0.914835	1	y	r	Florida
D. hispidus	UF 1198 (IZ)	24.9	25.5	0.976471	1	y	r	Florida
D. hispidus	UF 1186 (IZ)	31.5	33.8	0.931953	1	y	b	Florida
D. hispidus	UF 26100 (IZ)	38.9	44.5	0.874157	2	y	b	Florida
D. hispidus	UF 11608 (IZ)	27.8	28.1	0.989324	1	y	only 1 side available	Florida
D. hispidus	UF 7538 (IZ)	24.7	25.8	0.957364	1	y	r	Florida
D. hispidus	UF 1186 (IZ)	29.9	30.5	0.980328	1	y	l	Florida
D. hispidus	UF 1186 (IZ)	24.3	25.8	0.94186	1	y	l	Florida
D. hispidus	UF 1186 (IZ)	25.7	27	0.951852	2	y	b	Florida
D. hispidus	UF 1186 (IZ)	21.4	22.9	0.934498	2	n		Florida
D. hispidus	UF 1186 (IZ)	20.6	21.7	0.949309	2	n		Florida
D. hispidus	UF 1034 (IZ)	22.3	23.6	0.944915	2	n	only 1 side available	Florida
D. hispidus	UF 1034 (IZ)	23.2	23.3	0.995708	1	n		Florida
D. hispidus	UF 1034 (IZ)	20.6	21	0.980952	2	n		Florida
D. hispidus	UF 1034 (IZ)	18.1	18.2	0.994505	1	y	b	Florida
